# Supplementary material
Source: PubMed Central journal article supplement (PMC4505481)
Supplement: supp_M115.639609_jbc.M115.639609-1.pdf [file supp_M115.639609_jbc.M115.639609-1.pdf]

## Supplementary Information

### Movies S1-S4

**Movie S1.** Live cell imaging of WM239A cells expressing palmitoylation resistant mutant C<sup>590</sup>G MCAM-GFP. 57% (n=33) of recorded cells redistributed MCAM-GFP asymmetrically after addition of 1% FBS (1 frame/minute).

**Movie S2.** Live cell imaging of WM239A cells expressing palmitoylation resistant mutant MCAM-GFP. 4% (n=22) of recorded cells redistributed MCAM-GFP asymmetrically after addition of 1% FBS (1 frame/minute).

**Movie S3.** Live cell imaging WT MCAM-YFP (red) localizes distinctly from palmitoylation resistant C<sup>590</sup>G MCAM-CFP (green) in Wnt5a treated melanoma cells.

**Movie S4.** Live cell imaging of WT MCAM-YFP (red) and WT MCAM-CFP (green) colocalize asymmetrically in Wnt5a treated melanoma cells.
